# Supplementary material for: Alleviating Continuous Monocropping Obstacle in Melon: Biological Elimination of Phenolic Acid
Source: Research Square preprint supplement (doi:10.21203/rs.3.rs-127303/v1), 2020-12-23
Supplement: Supplementary file 1 [file b20e2f2deb65fa2994e1d1ee.docx]

**Alleviating continuous monocropping obstacle in melon：Biological elimination of** **phenolic acid**

Huiqin Xie1a, Yongli Ku2a, Xiangna Yang1, Le Cao3, Xueli Mei1, Nan Yang1, Cuiling Cao1*

1 College of Life Science, Northwest A&F University, Yangling 712100, China.

2 College of Forestry, Northwest A&F University, Yangling 712100, China.

3 School of Plant Protection, Anhui Agricultural University, Hefei 230000, China.

a Two authors made same contribution for this article.

*corresponding author: cuilingcao@163.com

**Table S1**. Sample sequence statistics

|  | Treatments | Mean number of Raw reads (per sample) | Mean number of clean quality reads(per sample) | Coverage (%) | Number of genera | Number of families | Number of orders | Number of classes | Number of phyla |
| --- | --- | --- | --- | --- | --- | --- | --- | --- | --- |
| Bacteria | CK0 | 99654±6794 | 91343±6457 | 99.23±0.02 | 280 | 115 | 52 | 51 | 25 |
| CK1 | 113835±5254 | 117136±13503 | 99.28±0.01 | 297 | 121 | 56 | 51 | 25 |
| T2 | 127418±14452 | 104342±5100 | 99.22±0.04 | 298 | 122 | 56 | 50 | 24 |
| Fungus | CK0 | 216655±9859 | 207486±7394 | 99.23±0.02 | 219 | 120 | 58 | 22 | 8 |
| CK1 | 169121±26181 | 161597±25536 | 99.28±0.01 | 184 | 94 | 48 | 23 | 8 |
| T2 | 199057±10853 | 193259±10399 | 99.22±0.04 | 158 | 94 | 49 | 23 | 8 |

CK0, control treatment with healthy soil; CK1, control treatment with monocropping soil; T2, High concentration of K3 inoculated treatment with monocropping soil (3 g· kg−1 soil).

**Table S2**. Fungal genera that change significantly in the soil

| Treatments | *Mortierella* | *Conocybe* | *Chaetomium* | *Fusarium* |
| --- | --- | --- | --- | --- |
| CK0 | 5.95±0.11b | 0.00±0.00b | 11.26±1.83a | 5.51±1.54a |
| CK1 | 24.88±0.17a | 1.01±0.01b | 1.55±0.46b | 12.28±0.00b |
| T2 | 22.45±2.36a | 2.57±0.72a | 11.61±0.11a | 1.89±0.01c |

CK0, control treatment with healthy soil; CK1, control treatment with monocropping soil; T2, High concentration of K3 inoculated treatment with monocropping soil (3 g· kg−1 soil). Different lowercase letters among treatments indicate significant difference (*P* < 0.05).
