# Supplementary material for: Alleviating Continuous Monocropping Obstacle in Melon: Biological Elimination of Phenolic Acid
Source: Research Square preprint supplement (doi:10.21203/rs.3.rs-127303/v1), 2020-12-23
Supplement: Supplementary file 2 [file b8e5b6f4aa24fc859c97c39c.docx]

**Alleviating continuous monocropping obstacle in melon：Biological elimination of** **phenolic acid**

Huiqin Xie1a, Yongli Ku2a, Xiangna Yang1, Le Cao3, Xueli Mei1, Nan Yang1, Cuiling Cao1*

1 College of Life Science, Northwest A&F University, Yangling 712100, China.

2 College of Forestry, Northwest A&F University, Yangling 712100, China.

3 School of Plant Protection, Anhui Agricultural University, Hefei 230000, China.

a Two authors made same contribution for this article.

*corresponding author: cuilingcao@163.com

**
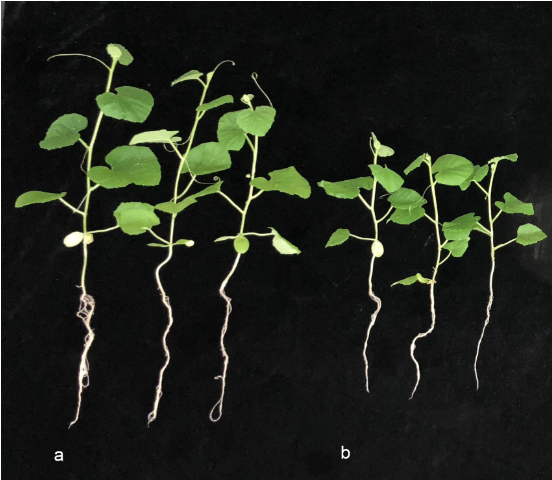
**

**Fig. S1** Effects of CA amendment on melon seedling growth. a, CK1; b, CAG1. CK, control treatment; CAG1, 400 μg·kg−1 soil CA.


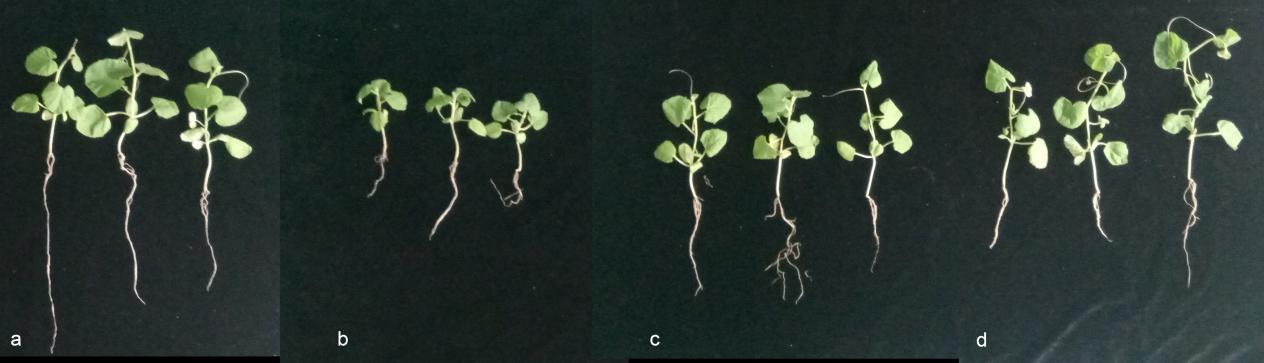


**Fig. S2** Melon seedling growth in response to K3 inoculation. a, CK0; b, CK1; c, T1; and d, T2. CK0, control treatment with healthy soil; CK1, control treatment with monocropping soil; T1, low concentration of K3 inoculated treatment with monocropping soil (1 g· kg−1 soil). T2, High concentration of K3 inoculated treatment with monocropping soil (3 g· kg−1 soil).
